# Supplementary material
Source: Springer Nature journal article supplement (https://www.springermedizin.de/resource/supplementary/12894_2014_389_MOESM1_ESM.pdf/9513682)

**a**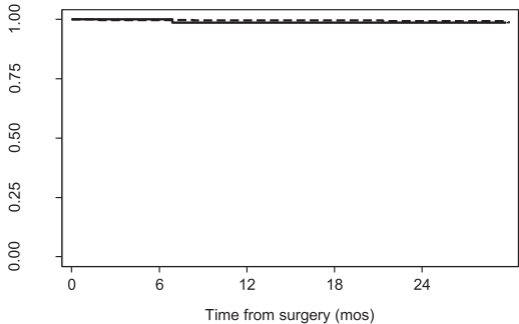

Number at risk

|       |     |     |     |     |     |
|-------|-----|-----|-----|-----|-----|
| White | 420 | 386 | 347 | 316 | 294 |
| Black | 84  | 72  | 66  | 59  | 52  |

**b**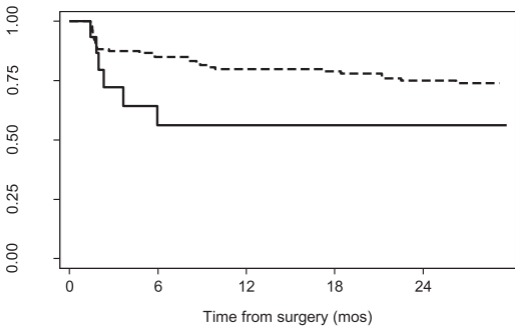

Number at risk

|       |     |     |    |    |    |
|-------|-----|-----|----|----|----|
| White | 130 | 102 | 90 | 85 | 72 |
| Black | 15  | 7   | 7  | 6  | 6  |

Supplement: MOESM1 [file 9513682]
